# Supplementary material for: Breast tumour initiating cell fate is regulated by microenvironmental cues from an extracellular matrix
Source: Royal Society of Chemistry journal article supplement (doi:10.1039/c2ib20034a), 2012-01-01
Supplement: c2ib20034a.pdf [file c2ib20034a.pdf]

## Supplementary Information

### Breast tumour initiating cell fate are regulated by microenvironmental cues from extracellular matrix

Sharmistha Saha,\*<sup>a</sup> Pang-Kuo Lo,<sup>b</sup> Xinrui Duan,<sup>a</sup> Hexin Chen,<sup>b</sup> and Qian Wang<sup>a</sup>

<sup>a</sup> Department of Chemistry and Biochemistry & Nanocenter, University of South Carolina, Columbia SC, 29208, USA. E-mail: wang@mail.chem.sc.edu

<sup>b</sup> Department of Biological Science, University of South Carolina, Columbia, SC, 29208, USA; E-mail: chen53@mailbox.sc.edu

**Table S1.** Water contact angle measurements.

| ECM substrates   | Water contact angle (Deg) |
|------------------|---------------------------|
| <b>Coll-I</b>    | 35.7 ± 2                  |
| <b>Fn</b>        | 48.2 ± 2                  |
| <b>PDL/Lam-I</b> | 54.4 ± 3                  |
| <b>PDL</b>       | 35.1 ± 2                  |

**Table S2.** Primer sequences for real time PCR.

| Gene Name    | Forward Sequence 5'-3'            | Reverse Sequence 5'-3'       |
|--------------|-----------------------------------|------------------------------|
| <i>Gapdh</i> | TGCCGCCTGGAGAAACCTGC              | CAGCCCCGGCATCGAAGGTG         |
| <i>Ck18</i>  | TCCGCGCCCAGTATGAAGCG              | GAGGGTGCGTCTCAGCTCCG         |
| <i>Ck14</i>  | CGCCGTCTGCTGGAGGGAGA              | GGAGACCACCTGCCATCGTGC        |
| <i>Sma</i>   | GGCTCCATCCTGGCTTCGCT              | GGAGGCGCTGATCCACAAAACG       |
| <i>Abcg2</i> | TTCACCTGTATATTATACTTCATGTTAGGACTG | CGATTGTCATGAGAAGTGTTGCT      |
| <i>Tp63</i>  | ACAGACTGCAGCATTGTCAGTTTC          | CTTCAGACTTGCCAAATCATCCA      |
| <i>Aldh1</i> | GCTGGGGTGGTGTGGGTT                | GACCATGTTACCCAGTTCTCTTC      |
| <i>Gli1</i>  | TCGGACCCACTCCAATGAGAA             | CTCGATGCCGCTTGGTCAC          |
| <i>CD133</i> | TTATATGGTGTTCACAATCCTGTTATGAC     | GCTTCCATGTTGACTATCTTGTTGTTTC |

|                                      |                                |                              |
|--------------------------------------|--------------------------------|------------------------------|
| <b><i>Foxc2</i></b>                  | GTGTCCACTGGATAAGGTTTCGTCT      | CATCTACTGTACAAAGCCATGCACTTC  |
| <b><i>Il6</i></b>                    | AAATCGTGGAAATGAGAAAAGAGTTGT    | TTTCCTGATTATATCCAGTTTGGTAGCA |
| <b><i>Snail</i></b>                  | GCCTTGTGTCTGCACGACCTG          | TCTTCACATCCGAGTGGGTTTG       |
| <b><i>Twist</i></b>                  | CCACGAGCGGCTCAGCTAC            | CCTTCTCTGGAAACAATGACATCTAGG  |
| <b><i>Pai</i></b>                    | AGGTAAACGAGAGCGGCACAGT         | GCCCATGAAGAGGATTGTCTCTGTC    |
| <b><i>Cdh2</i></b>                   | GCTGATCCTTGTTCATGTTTGTG        | GCTGGCTCAAGTCATAGTCCTGGT     |
| <b><i>Zeb1</i></b>                   | AGACACAAATATGAGCACACAGGTAAGA   | GCTTGCCACACTTGTCACATTG       |
| <b><i>CD49f</i><br/><i>(Ia6)</i></b> | GGCTCTATTAGTGTTTTTACTGTGGAAGTG | AATACTATGCATCGGAAGTAAGCCTCTC |
| <b><i>CD61</i><br/><i>(Iβ3)</i></b>  | GAGCCAAGTGGGACACAGCA           | CGTCATCTGAAGATGGTCTCATTAAGT  |
| <b><i>Ia1</i></b>                    | AACTGGATGGTCATCTTCTGATAATGT    | CTGGATTGTGCCTCTTTTGAGAAC     |
| <b><i>Ia2</i></b>                    | TAACATCACCTGCTGGCTGAAAG        | CTGCACAGTCTGGAAAGTCGAAG      |
| <b><i>Ia5</i></b>                    | CCCCAAAAGAAACTTCAGGTGG         | TTTGAAGAAGCCGAGCTTGTAGAG     |
| <b><i>Iav</i></b>                    | GGATCTCTTCAACTCTACACTAGTCACC   | CGTTTGAAAAAGCCCATCCTG        |
| <b><i>Iβ1</i></b>                    | CAAGTGGGACACGGGTGAA            | CTACTGTGACTAAGATGCTGCTGCTG   |
| <b><i>Iβ4</i></b>                    | GAGCCCTTCCTCATGGATGGT          | GAACTGTTGGTCCATATGAGTGCTG    |

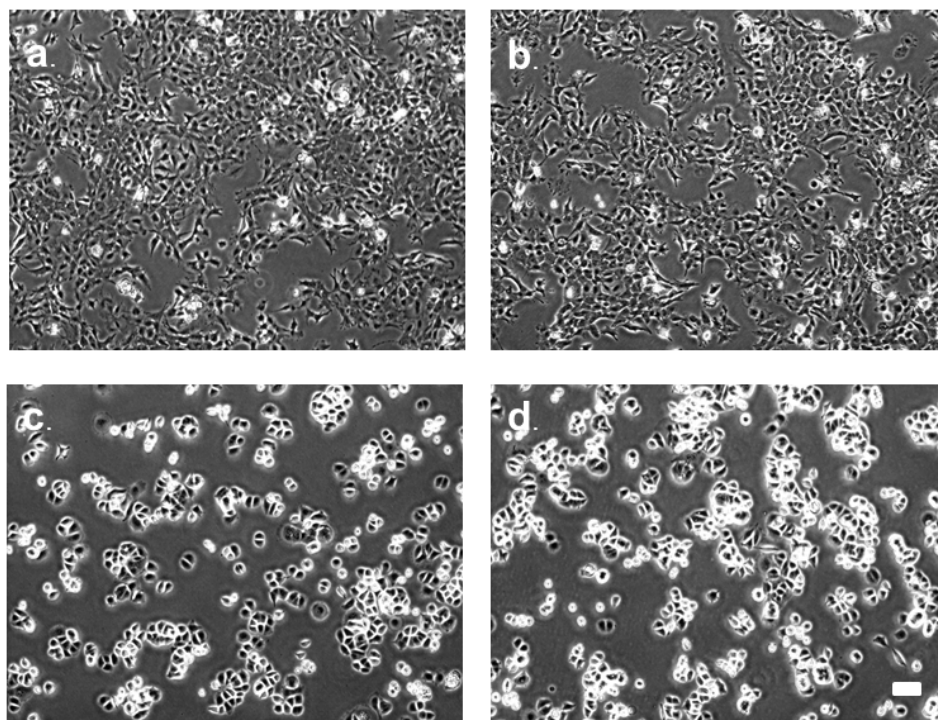

**Fig. S1.** Phase contrast micrographs of H6O5 cells on (a) Poly-lysine coated TCP, (b) on TCP and MCF-7 cells on (c) Poly-lysine coated TCP, (d) on TCP. No difference in morphology was observed between cells on Poly-lysine coating and TCP. Scale bar = 50  $\mu\text{m}$ .

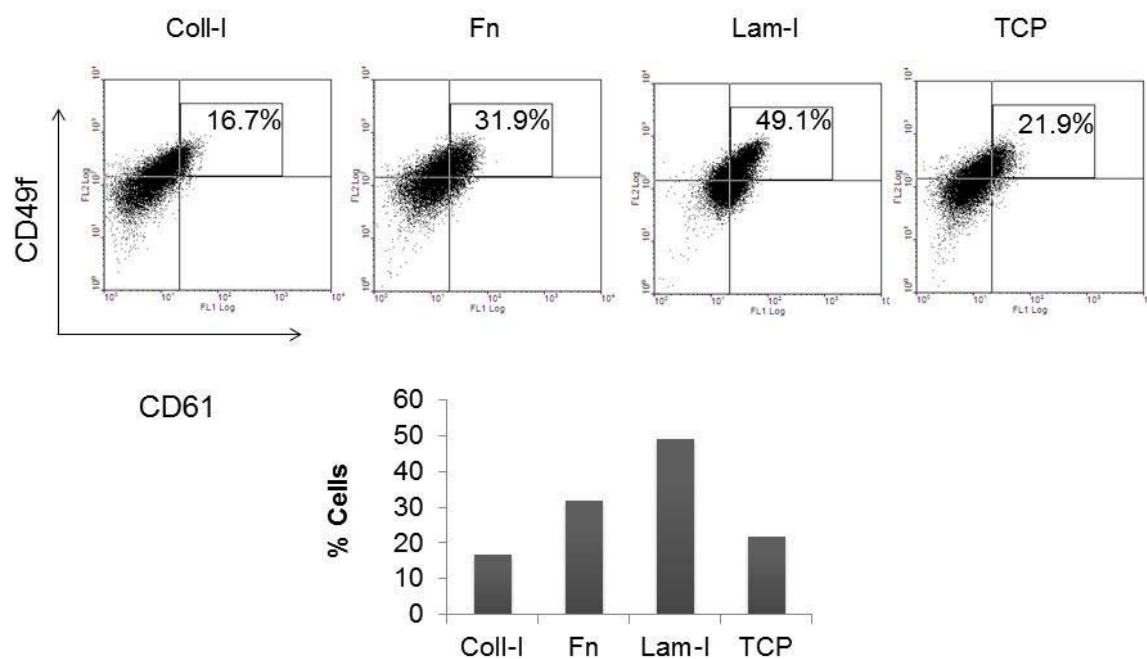

**Fig. S2.** FACS analysis showed that Lam-I and Fn maintained the majority of the TIC population whereas Coll-I and TCP cell cultures exhibited significant loss of TICs after two weeks of culture on coated substrates. The FACS analysis data were also plotted as a bar graph (the bottom panel).

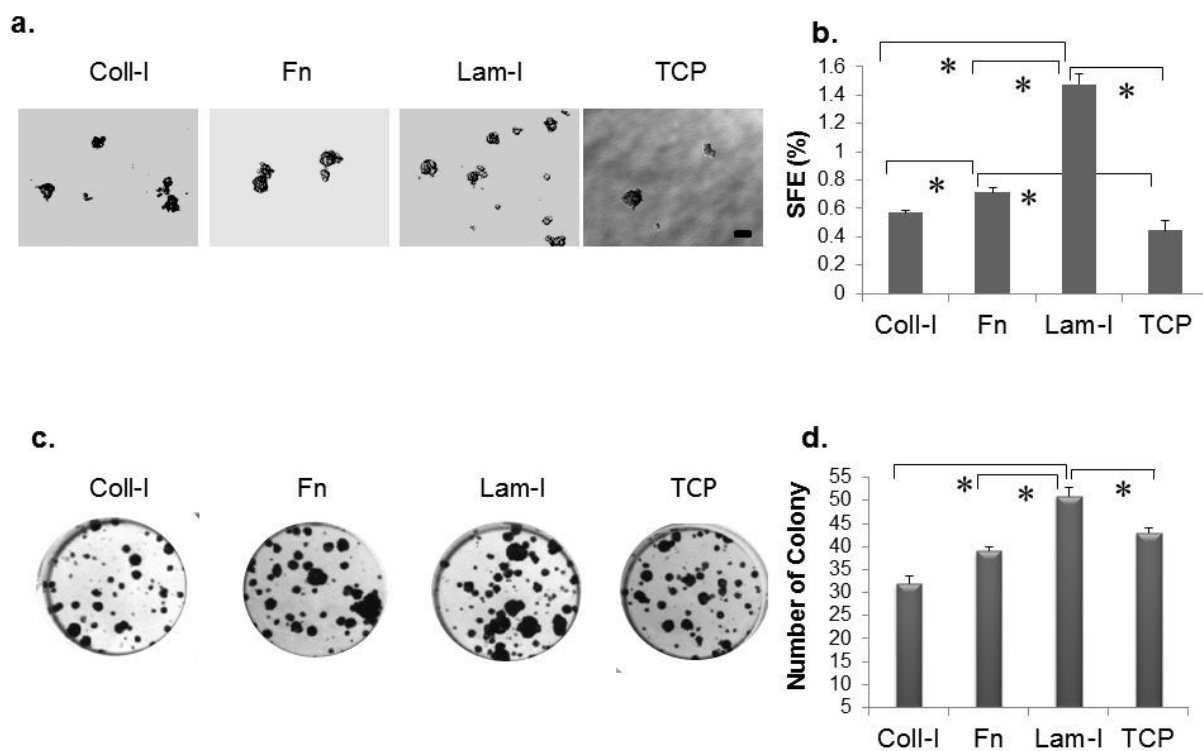

**Fig. S3.** TICs exhibit greatest self-renewal characteristics in Lam-I after two weeks of culture. (a) *In vitro* tumorsphere formation analysis of TICs retrieved from Coll-I, Fn, Lam-I and TCP. Scale bar = 50  $\mu$ m. (b) Plot showing sphere formation efficiency (SFE) for each substrate. (c) *In vitro* clonogenic assay of TICs pre-cultured on Coll-I, Fn, Lam-I and TCP substrates. (d) Plot showing colony numbers for each substrate. All measurements were done in triplicates and data are indicated as mean  $\pm$  standard deviation. (\*)  $p < 0.05$  indicates a statistically significant difference.

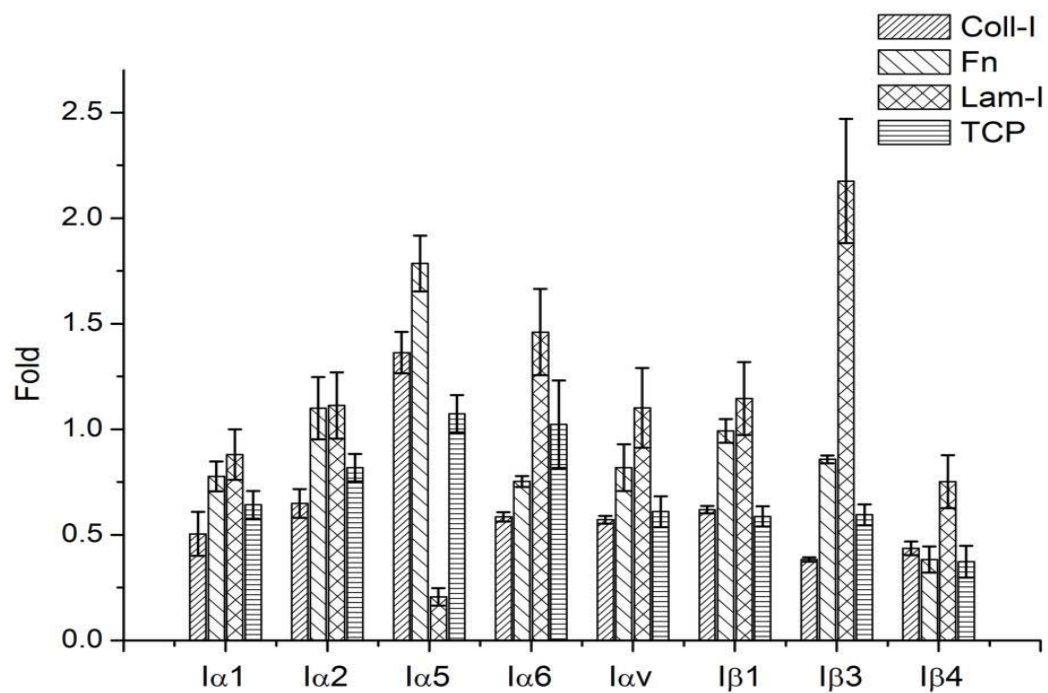

**Fig. S4.** Expression analysis of integrins in sorted cells cultured on Coll-I Fn, Lam-I and TCP substrates for one week using quantitative real-time reverse transcription PCR analysis. Each expression was normalized by using *Gapdh* as the internal control.

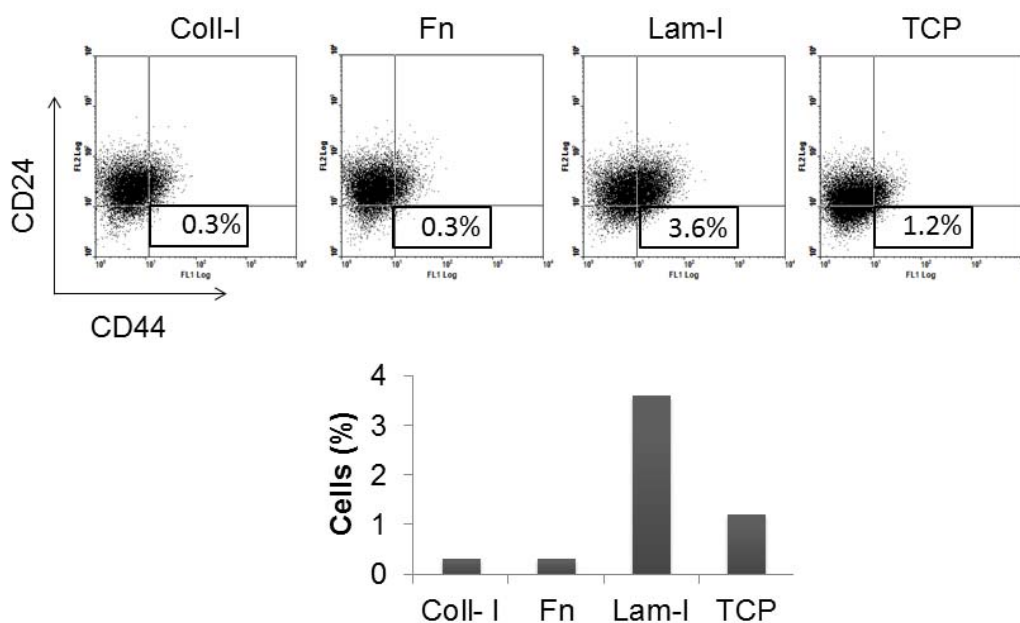

**Fig. S5.** FACS analysis for CD44<sup>high</sup>CD24<sup>low</sup> population in MCF-7 cell line after one week of culture on coated substrates, showed increase in TICs population in Lam-I whereas Coll-I and Fn cultures exhibited significant loss of TICs. The FACS analysis data were also plotted as a bar graph (the bottom panel). MCF-7 is a human breast cancer cell line reported to have very low population of CD44<sup>high</sup>CD24<sup>low</sup> that identified as a cancer stem cell like population.
